# Supplementary material for: Fabrication of a narrow size nano curcuminoid emulsion by combining phase inversion temperature and ultrasonication: preparation and bioactivity
Source: Royal Society of Chemistry journal article supplement (doi:10.1039/d1nj01241j), 2021-01-01
Supplement: d1nj01241j2.pdf [file d1nj01241j2.pdf]

# Electronic Supplementary Information

## **Fabrication of the narrow size nano curcuminoids emulsion by combining phase inversion temperature and ultrasonication: preparation and bioactivity**

Quang- Hieu Tran<sup>a\*</sup>, Thi Thanh- Ho Thuy<sup>b</sup>, Thanh-Tu Nguyen<sup>b</sup>

Fig S1. MS spectra of curcuminoids extracted from turmeric, Curcumin: (Cur),  $m/z = 367.11$ ,  $C_{21}H_{20}O_6$ , Demethoxycurcumin (DMC):  $C_{20}H_{18}O_5$ ,  $m/z = 339.22$  and Bisdemethoxycurcumin (BDMC):  $C_{19}H_{16}O_4$ ,  $m/z = 308.25$ .

Fig S2. Size distribution of NCE-03

Fig S3. Size distribution of NCE-03 after 30 days of storage

Fig S4. Size distribution of NCE-03 after 60 days of storage

Fig S5. Size distribution of NCE-01

Fig S6. Size distribution of NCE-01 after 60 days of storage

Fig S7. Size distribution of NCE-04 after 60 days of storage

Fig S8. Size distribution of NCE-08

Fig S9. Size distribution of NCE-08 after 60 days of storage

Fig S10. Size distribution of NCE-05

Fig S11. Size distribution of NCE-05 after 60 days of storage

Fig S12. Zeta Potential of NCE-1

Fig S13. Zeta Potential of NCE-3

Fig S14. Preparation of Intestinal absorption test.

---

Rawdata\_20180905112334 #41 RT: 0.34 AV: 1 NL: 7.29E4  
T: - p EST Q1MS [100.000-600.000]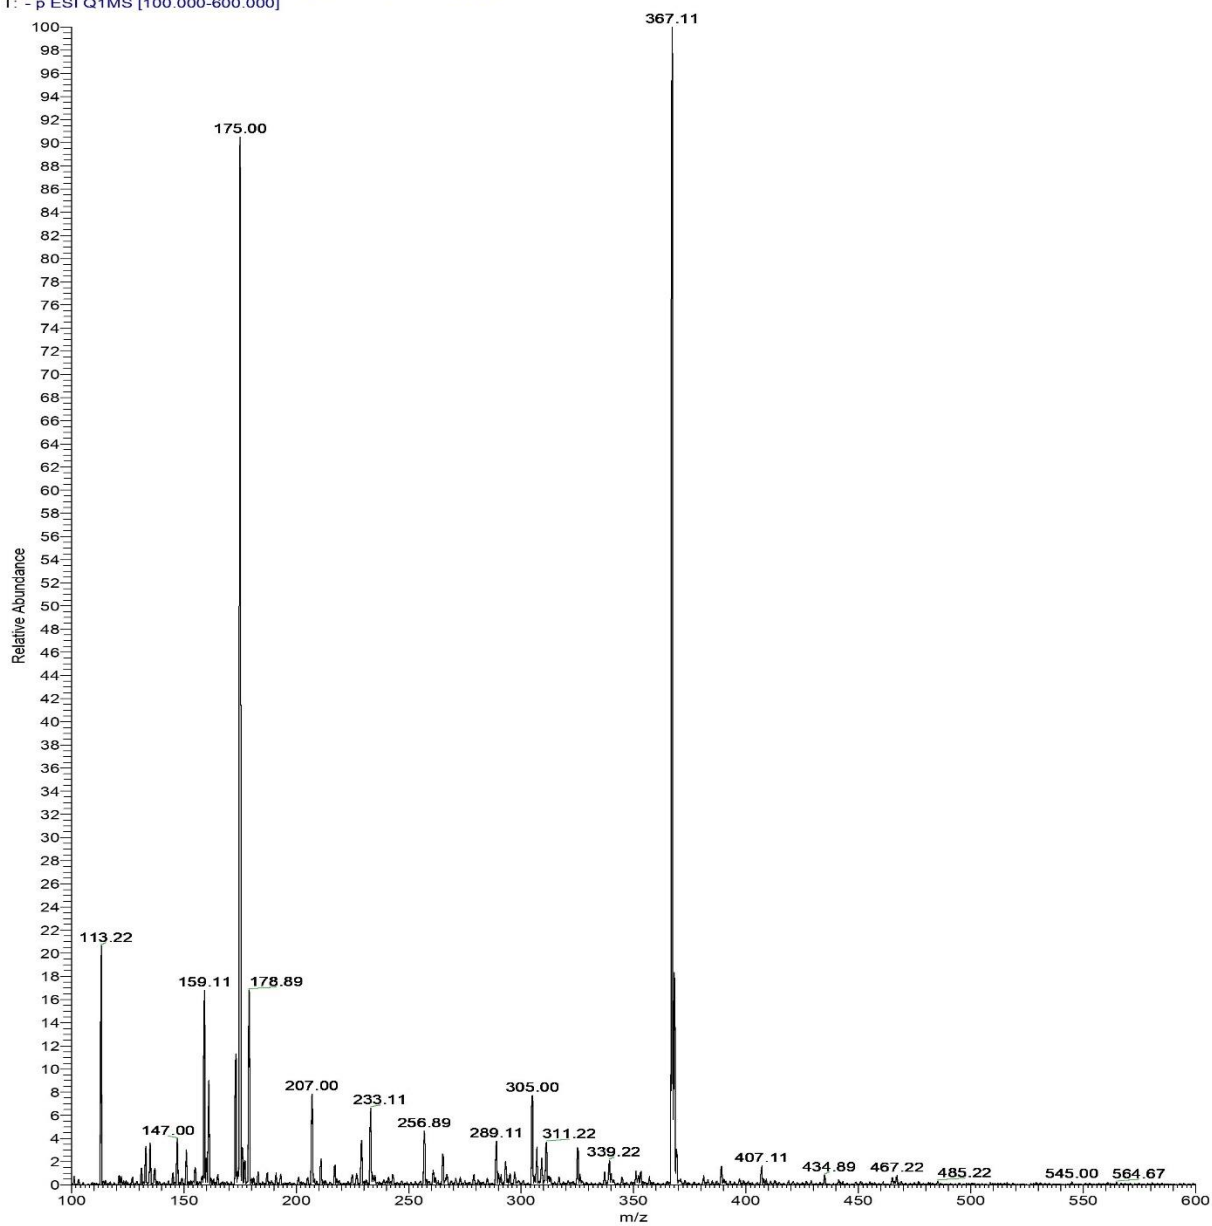

Fig S1. MS spectra of curcuminoids extracted from turmeric, Curcumin: (Cur),  $m/z = 367.11$ ,  $C_{21}H_{20}O_6$ , Demethoxycurcumin (DMC):  $C_{20}H_{18}O_5$ ,  $m/z = 339.22$  and Bisdemethoxycurcumin (BDMC):  $C_{19}H_{16}O_4$ ,  $m/z = 308.25$ .

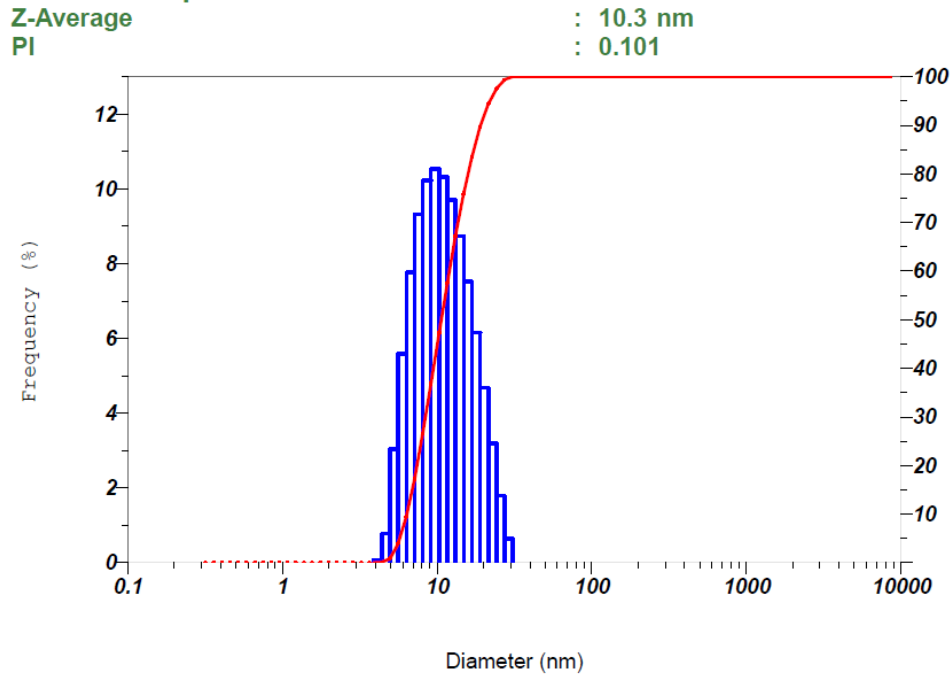

Fig S2. Size distribution of NCE-03

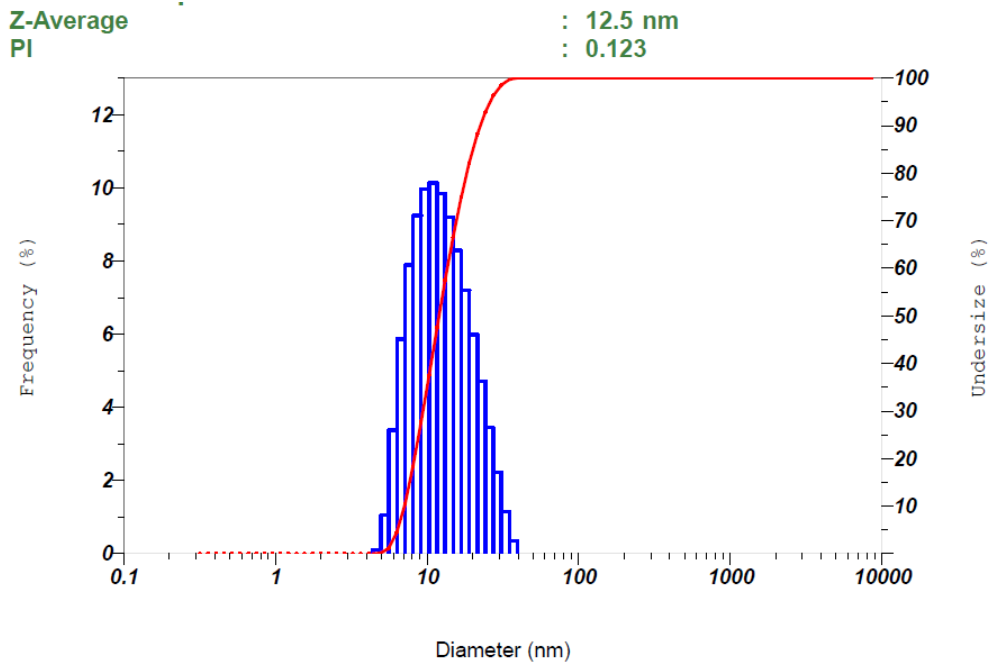

Fig S3. Size distribution of NCE-03 after 30 days of storage

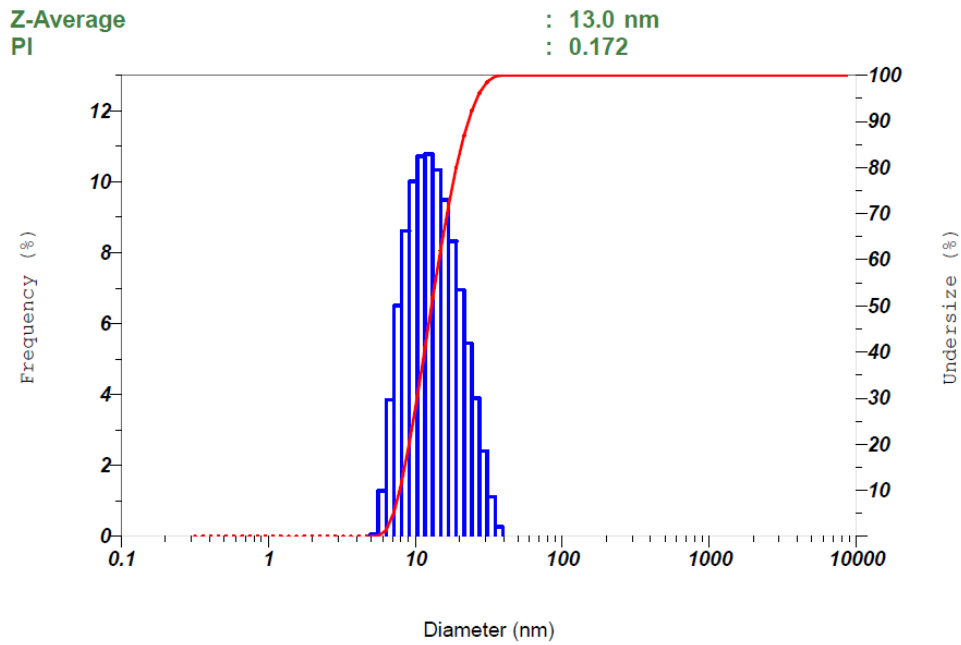

Fig S4. Size distribution of NCE-03 after 60 days of storage

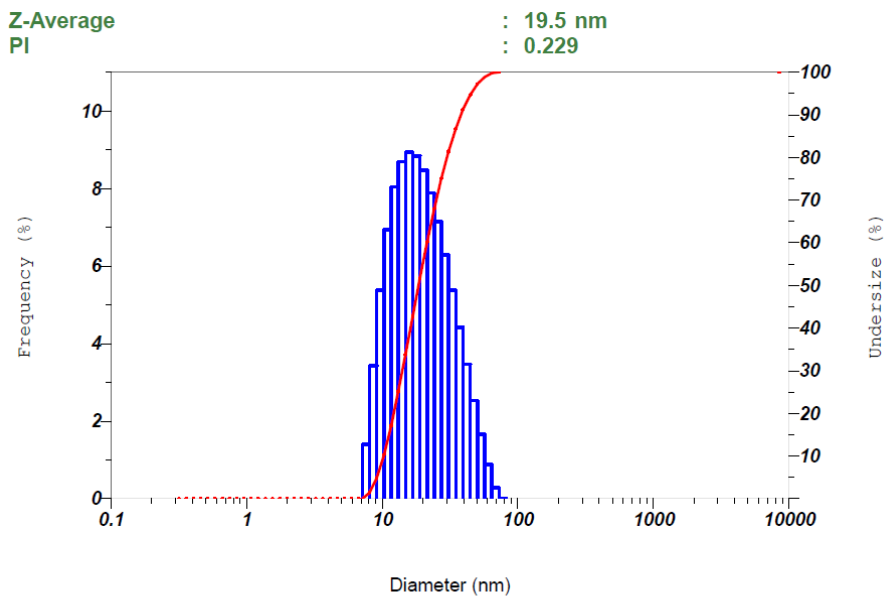

Fig S5. Size distribution of NCE-01

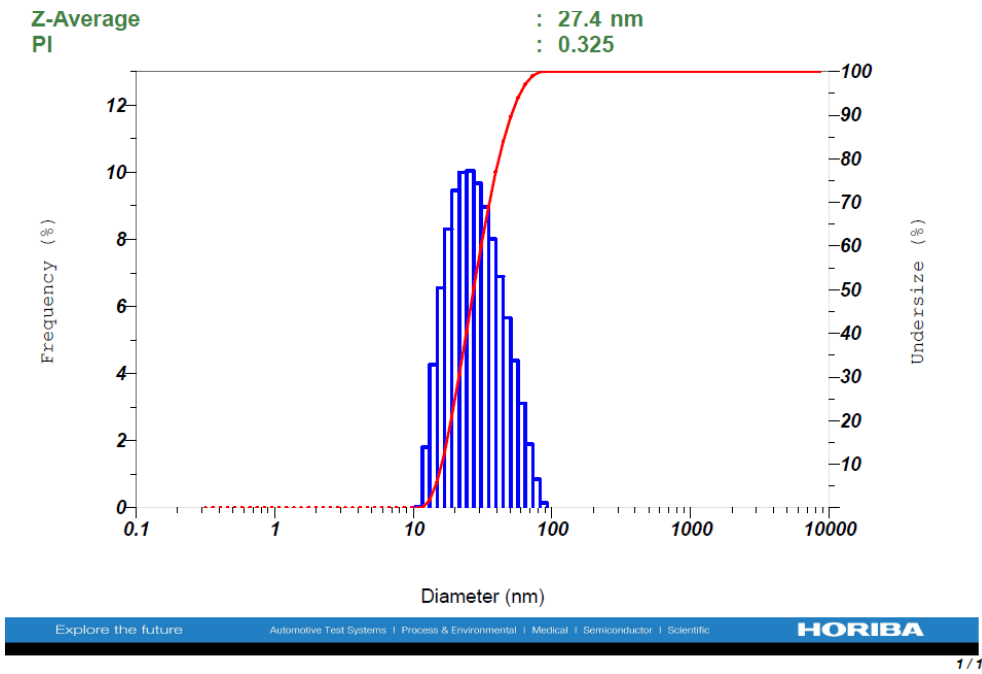

Fig S6. Size distribution of NCE-01 after 60 days of storage

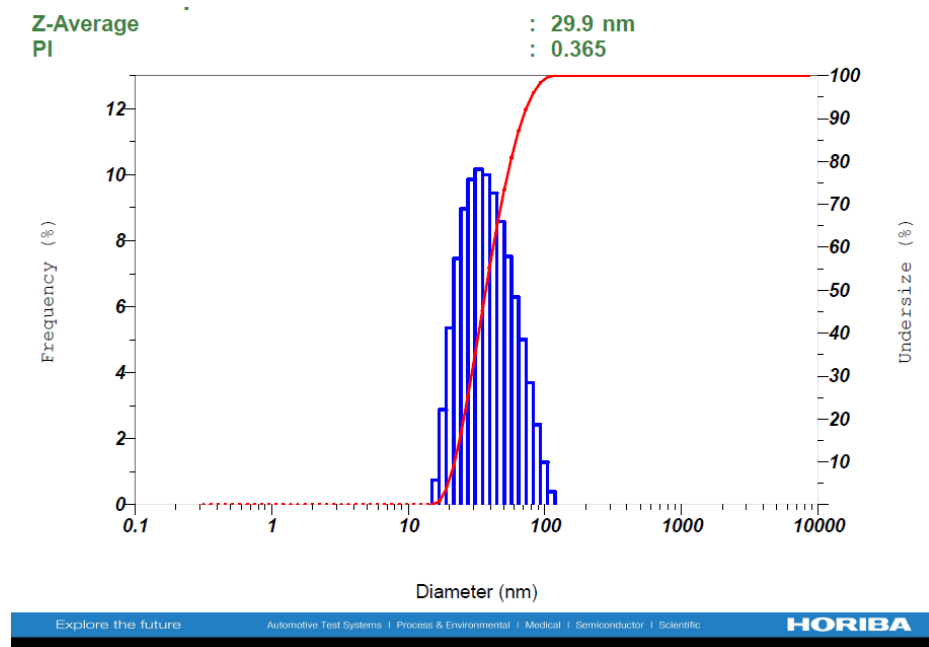

Fig S7. Size distribution of NCE-04 after 60 days of storage

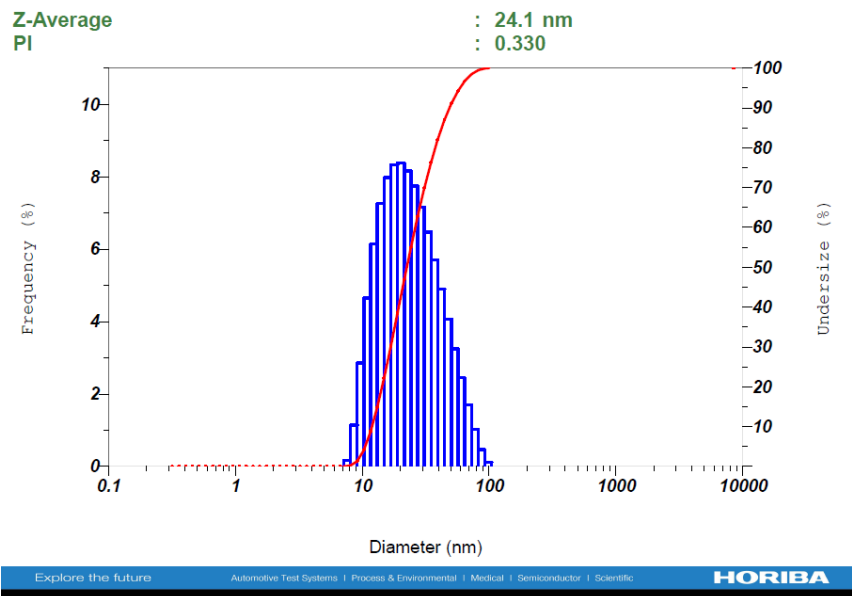

Fig S8. Size distribution of NCE-08

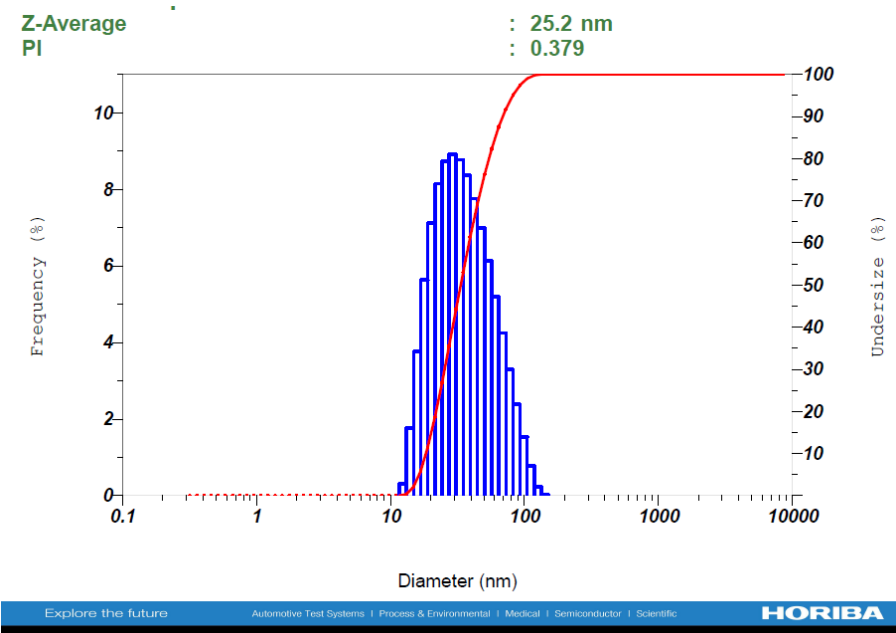

Fig S9. Size distribution of NCE-08 after 60 days of storage

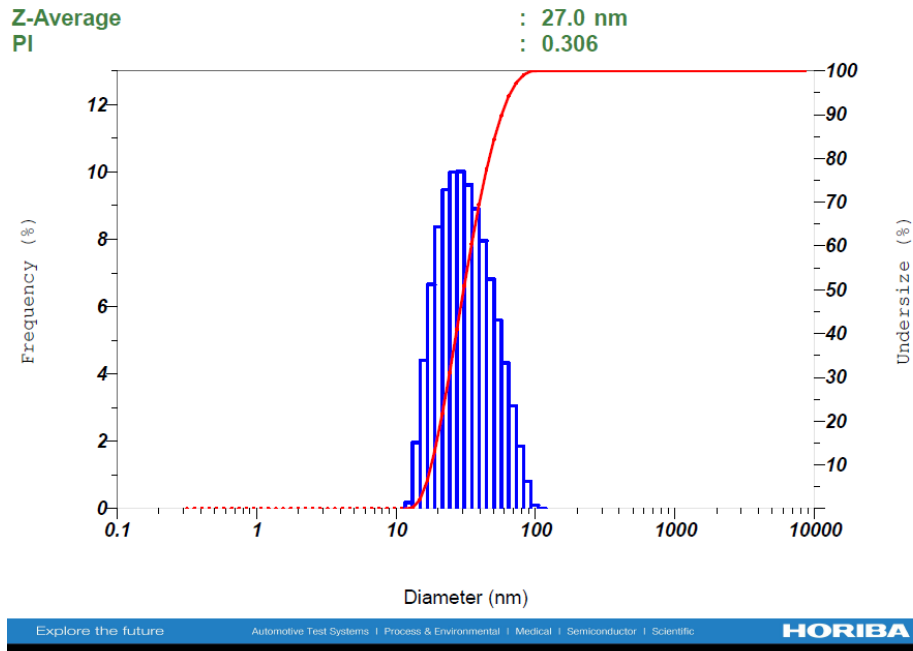

Fig S10. Size distribution of NCE-05

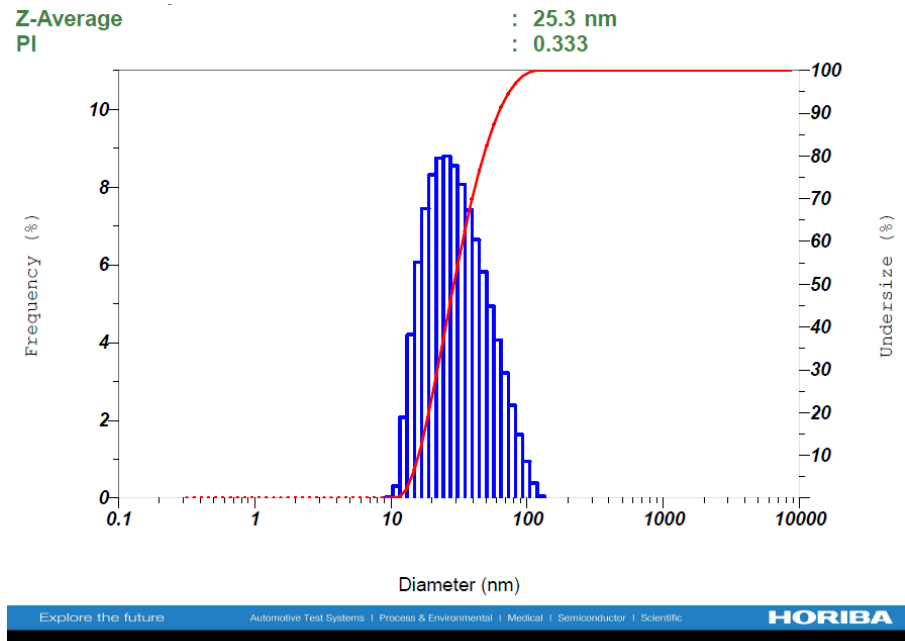

Fig S11. Size distribution of NCE-05 after 60 days of storage

# SZ-100

## Measurement Results

### 110-Zeta.nzt Measurement Results

Date : Thursday, May 9, 2019 7:22:08 AM  
Measurement Type : Zeta Potential  
Sample Name : 110  
Temperature of the Holder : 25.0 °C  
Dispersion Medium Viscosity : 0.896 mPa·s  
Conductivity : 0.076 mS/cm  
Electrode Voltage : 3.8 V

### Calculation Results

| Peak No. | Zeta Potential | Electrophoretic Mobility      |
|----------|----------------|-------------------------------|
| 1        | -11.2 mV       | -0.000087 cm <sup>2</sup> /Vs |
| 2        | --- mV         | --- cm <sup>2</sup> /Vs       |
| 3        | --- mV         | --- cm <sup>2</sup> /Vs       |

Zeta Potential (Mean) : -11.2 mV  
Electrophoretic Mobility Mean : -0.000087 cm<sup>2</sup>/Vs

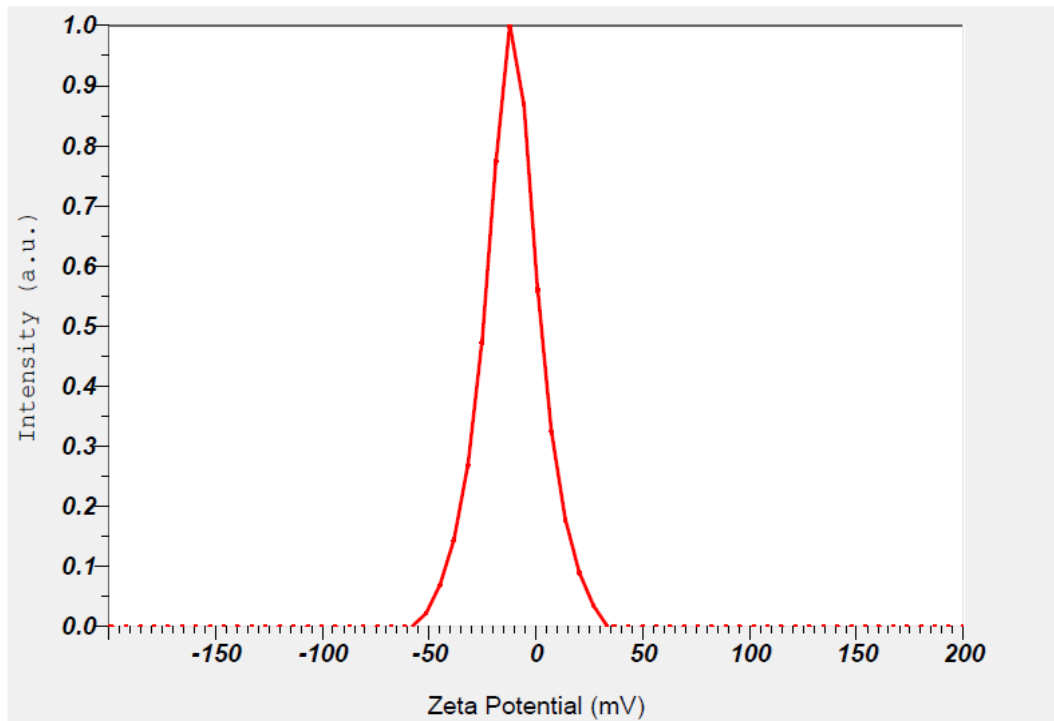

Fig S12. Zeta Potential of NCE-1



# SZ-100

## Measurement Results

711-Zeta.nzt

### Measurement Results

Date : Monday, September 30, 2019 10:40:59 AM  
Measurement Type : Zeta Potential  
Sample Name : 711  
Temperature of the Holder : 24.9 °C  
Dispersion Medium Viscosity : 0.897 mPa·s  
Conductivity : 0.297 mS/cm  
Electrode Voltage : 3.3 V

### Calculation Results

| Peak No. | Zeta Potential | Electrophoretic Mobility      |
|----------|----------------|-------------------------------|
| 1        | -11.3 mV       | -0.000088 cm <sup>2</sup> /Vs |
| 2        | --- mV         | --- cm <sup>2</sup> /Vs       |
| 3        | --- mV         | --- cm <sup>2</sup> /Vs       |

Zeta Potential (Mean) : -11.3 mV  
Electrophoretic Mobility Mean : -0.000088 cm<sup>2</sup>/Vs

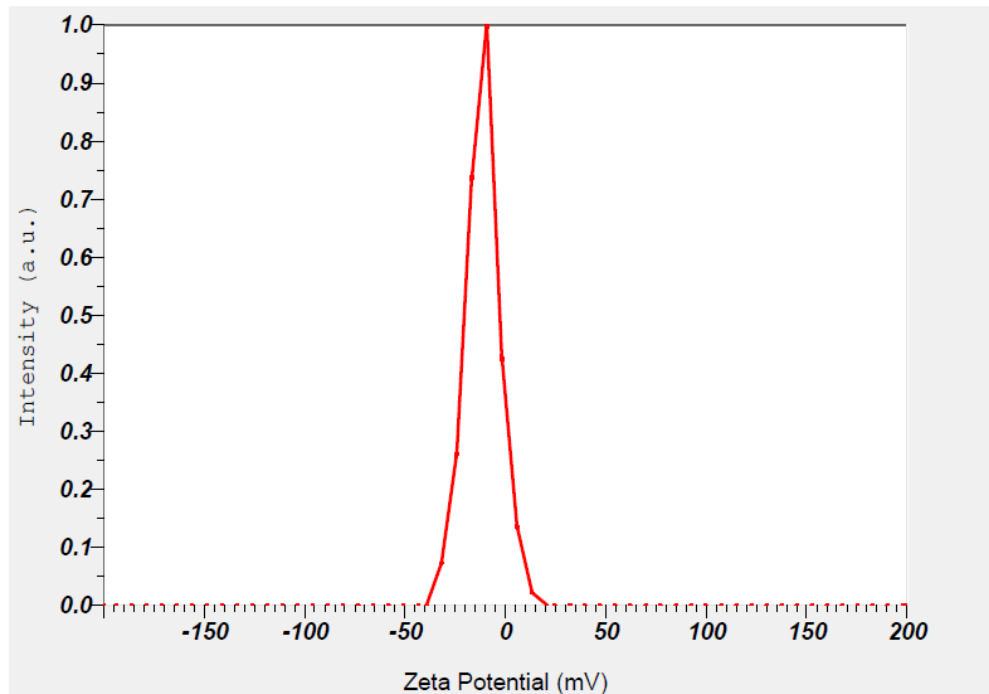

Explore the future

Automotive Test Systems | Process & Environmental | Medical | Semiconductor | Scientific

**HORIBA**

1/1

Fig S13. Zeta Potential of NCE-3

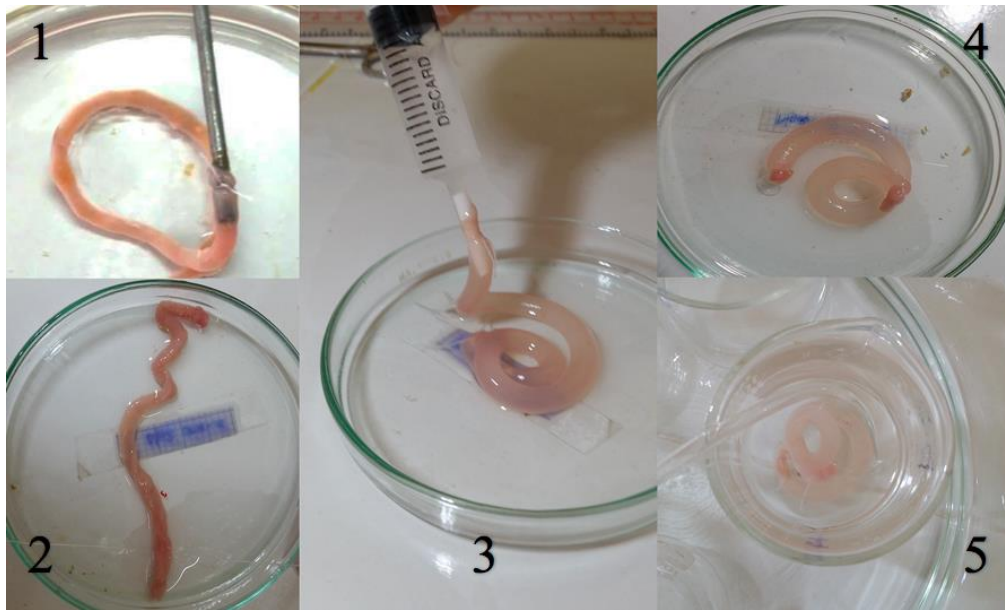

Fig S14. Preparation of Intestinal absorption test.

---
